# Supplementary material
Source: PubMed Central journal article supplement (PMC3079786)
Supplement: NIHMS280668-supplement-01.pdf [file NIHMS280668-supplement-01.pdf]

## Supplement S1

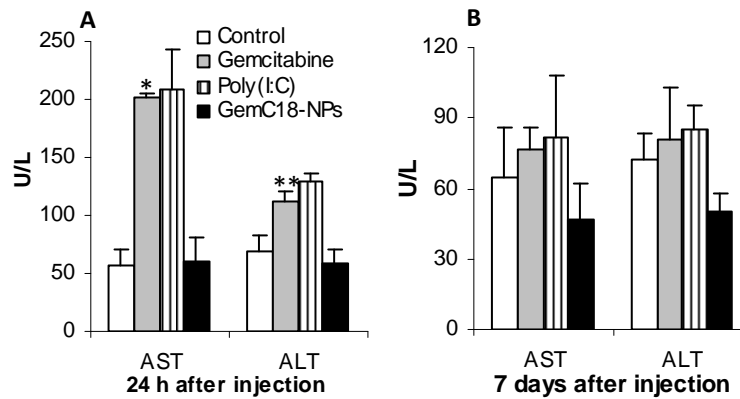

**S1. Plasma ALT and AST activity.** Healthy C57BL/6 mice ( $n = 3$ ) were injected via the tail vein with GemC18-NPs (1 mg of GemC18/mouse) or 0.566 mg of gemcitabine HCl in sterile mannitol (5%). As controls, mice were either injected (i.v.) with polyriboinosinic-polyribocytidylic acid (poly(I:C) or pI:C, 50  $\mu\text{g}/\text{mouse}$  (Sigma) as a positive control or sterile mannitol solution as a negative control. Twenty-four h (**A**) or 7 days (**B**) later, mice were euthanized to collect blood samples. Aspartate aminotransferase (AST) and alanine aminotransferase (ALT) activities in the serum samples were determined using AST and ALT kits from Teco Diagnostics (Anaheim, CA). Data reported are mean  $\pm$  S.D. in A, \*  $p < 0.0001$ , \*\*  $p = 0.008$ , Control vs. Gemcitabine.
